# Supplementary material
Source: Springer Nature journal article supplement (https://www.springermedizin.de/resource/supplementary/12885_2009_1690_MOESM4_ESM.pdf/9472674)

**A**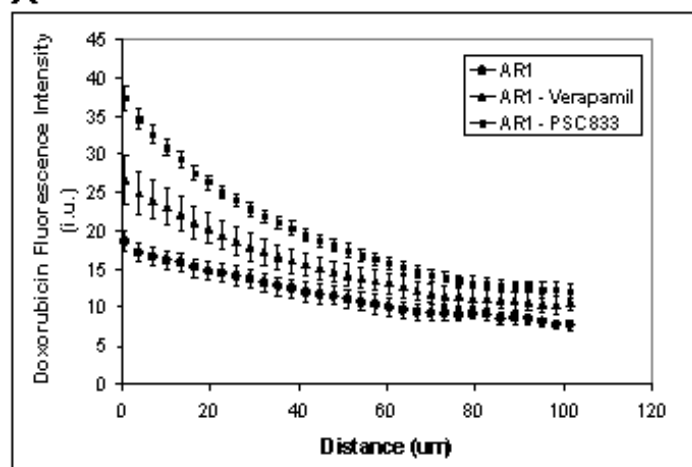**B**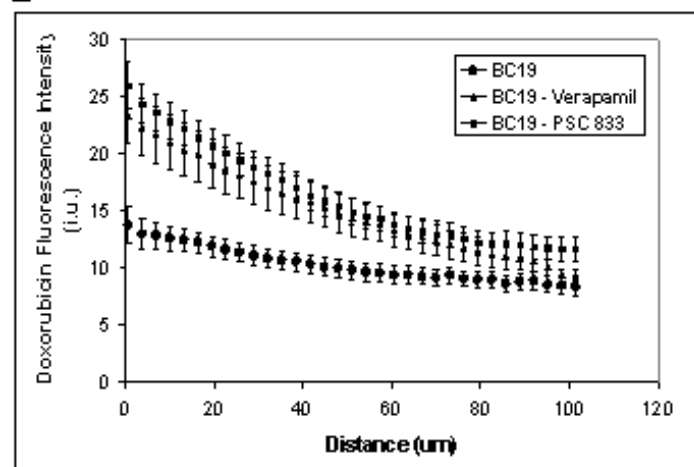**C**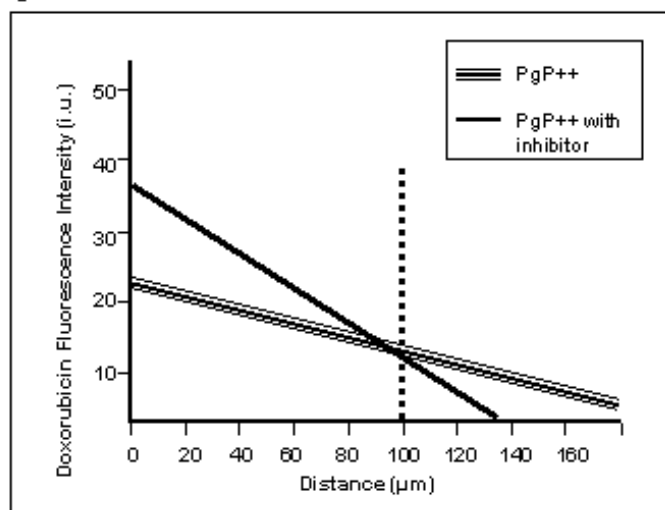

Supplement: MOESM4 [file 9472674]
